# Supplementary material
Source: publisher figshare collection journal article supplement (https://tandf.figshare.com/ndownloader/files/22782806)
Supplement: Supplementary file 1 [file 22782806]

**Supplementary Materials**

Vanadium complexes with salicylaldehyde based Schiff base ligands – Structure, properties and biological activity

JANUSZ SZKLARZEWICZ*, ANNA JUROWSKA, MACIEJ HODOROWICZ, RYSZARD GRYBOŚ, KRZYSZTOF KRUCZAŁA, MONIKA GŁUCH-LUTWIN and GRZEGORZ KAZEK

The reflectance spectra of complexes **1**-**3** and **6**-**8** are presented in Figures S1-S6. The UV-Vis absorbance spectra of complexes **1**, **2** and **8** in organic solvents are presented in Figures S7-S20.


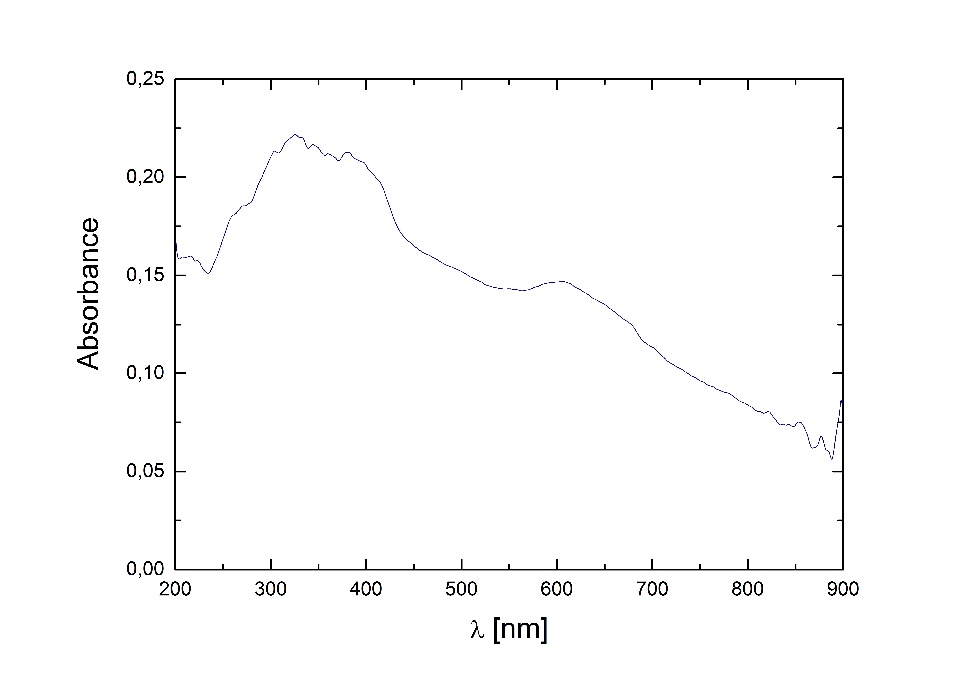


Figure S1. Reflectance spectrum of **1**. BaSO4 as reference.


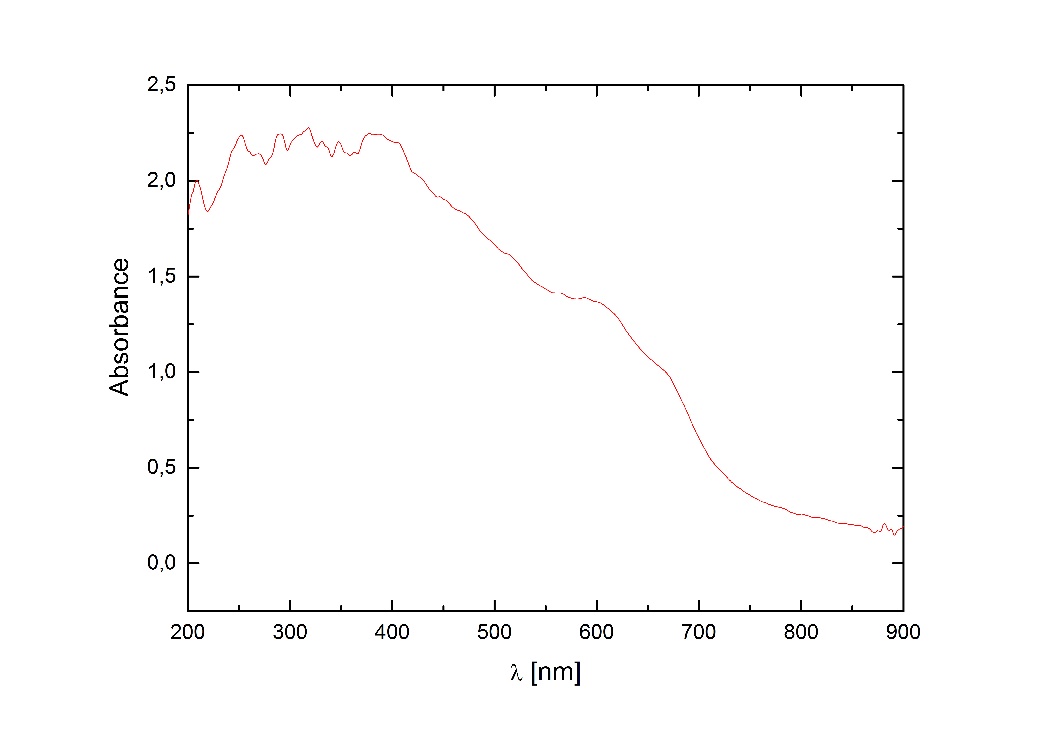


Figure S2. Reflectance spectrum of **2**. BaSO4 as reference.


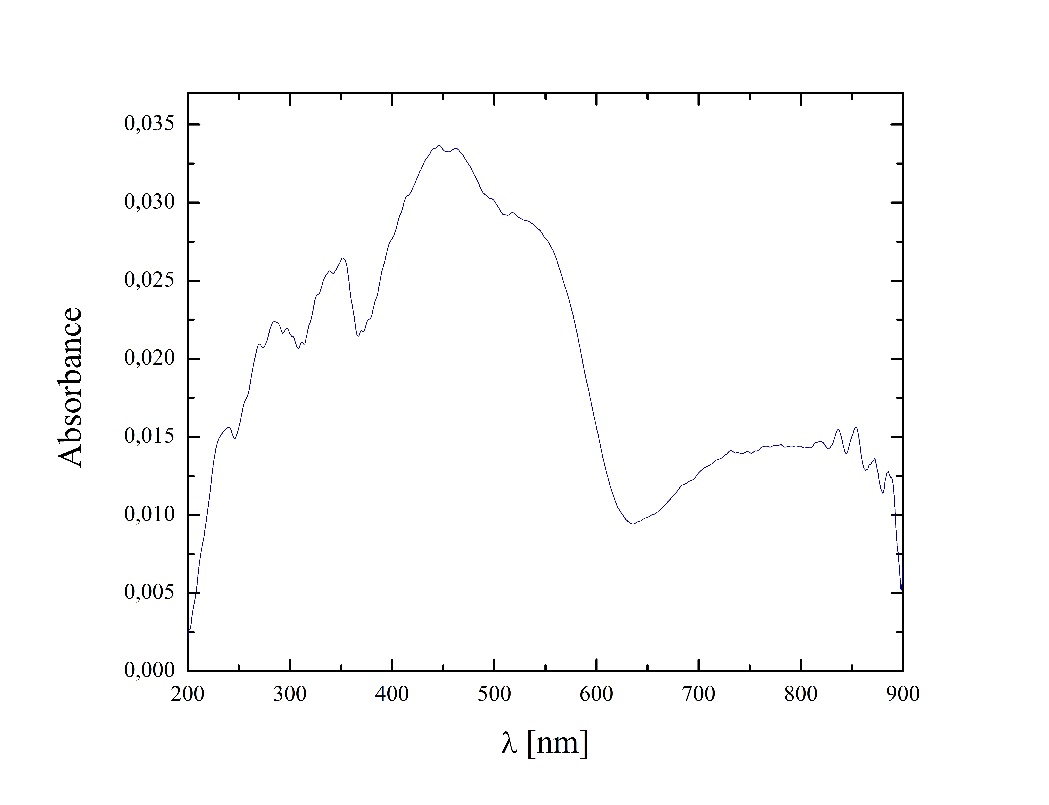


Figure S3. Reflectance spectrum of **3**. BaSO4 as reference.


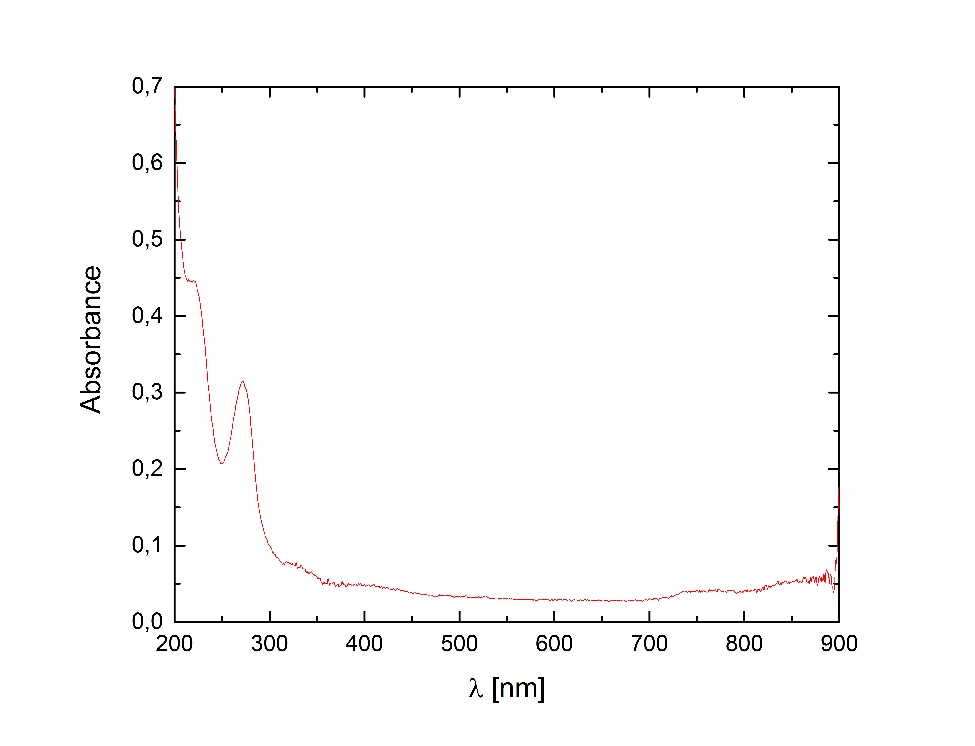


Figure S4. Reflectance spectrum of **6**. BaSO4 as reference.


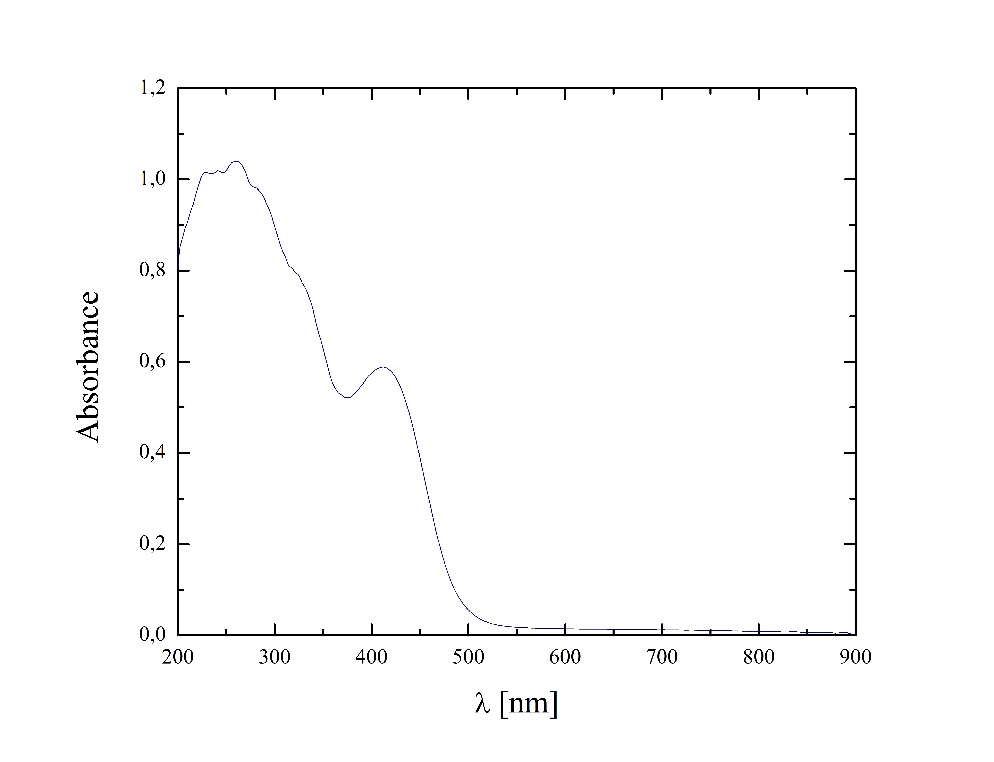


Figure S5. Reflectance spectrum of **7**. BaSO4 as reference.


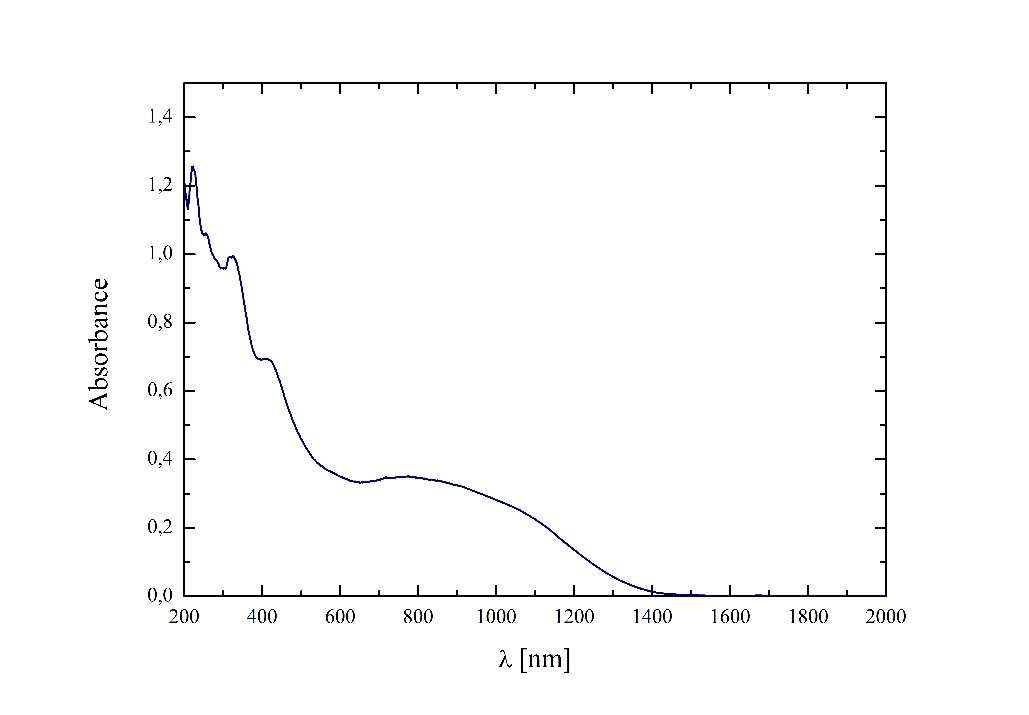


Figure S6. Reflectance spectrum of **8**. BaSO4 as reference.


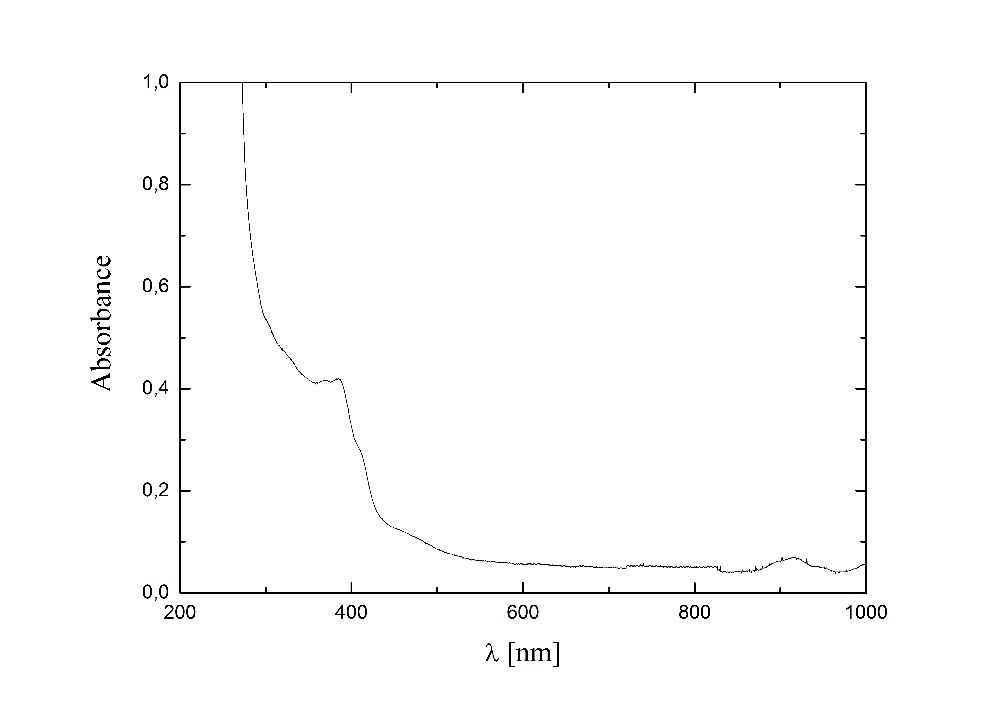


Figure S7. UV-Vis spectrum of **1** in DMF, d = 1 cm.


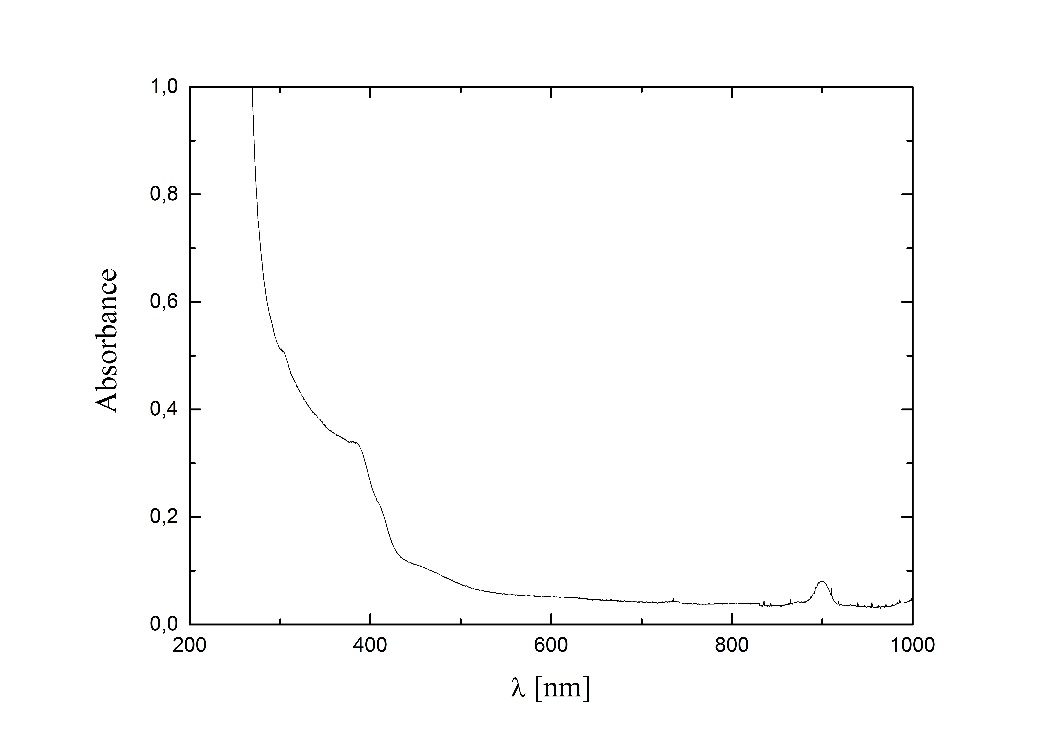


Figure S8. UV-Vis spectrum of **1** in DMSO, d = 1 cm.


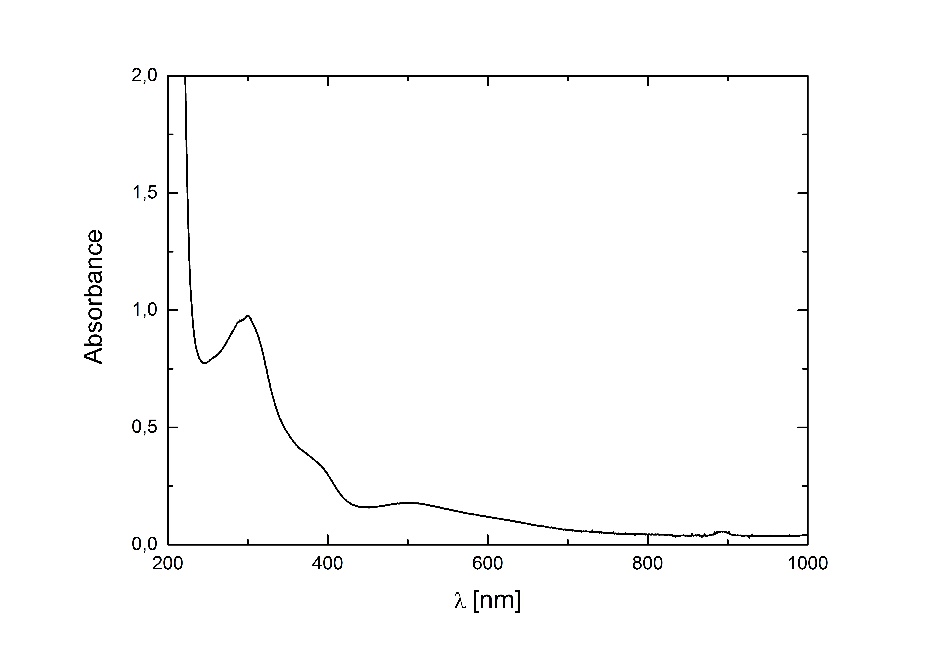


Figure S9. UV-Vis spectrum of **1** in EtCl2, d = 1 cm.


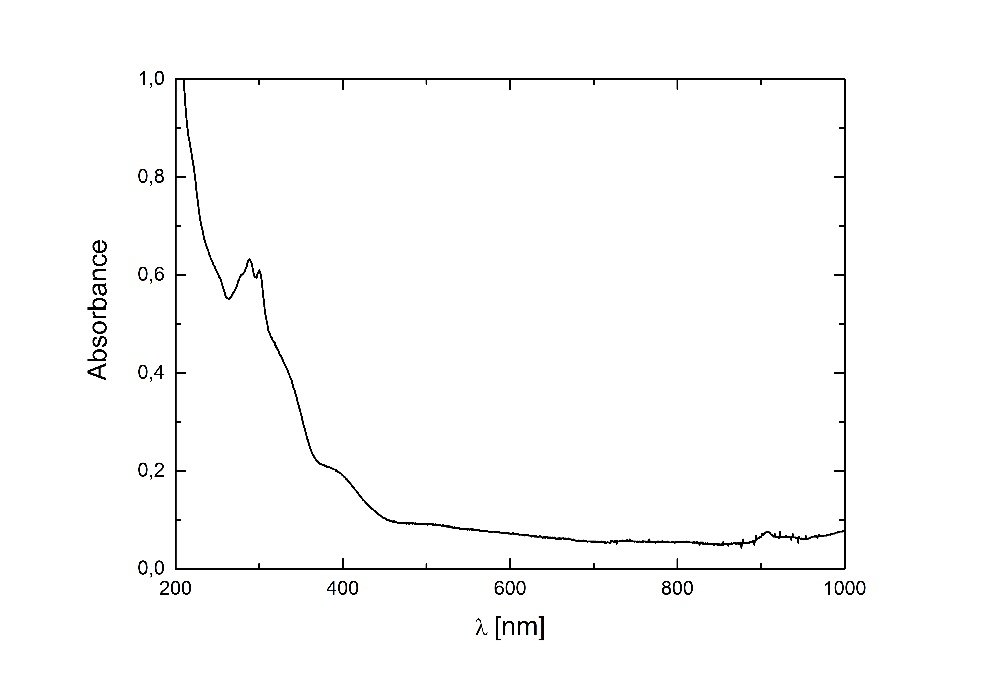


Figure S10. UV-Vis spectrum of **1** in EtOH, d = 1 cm.


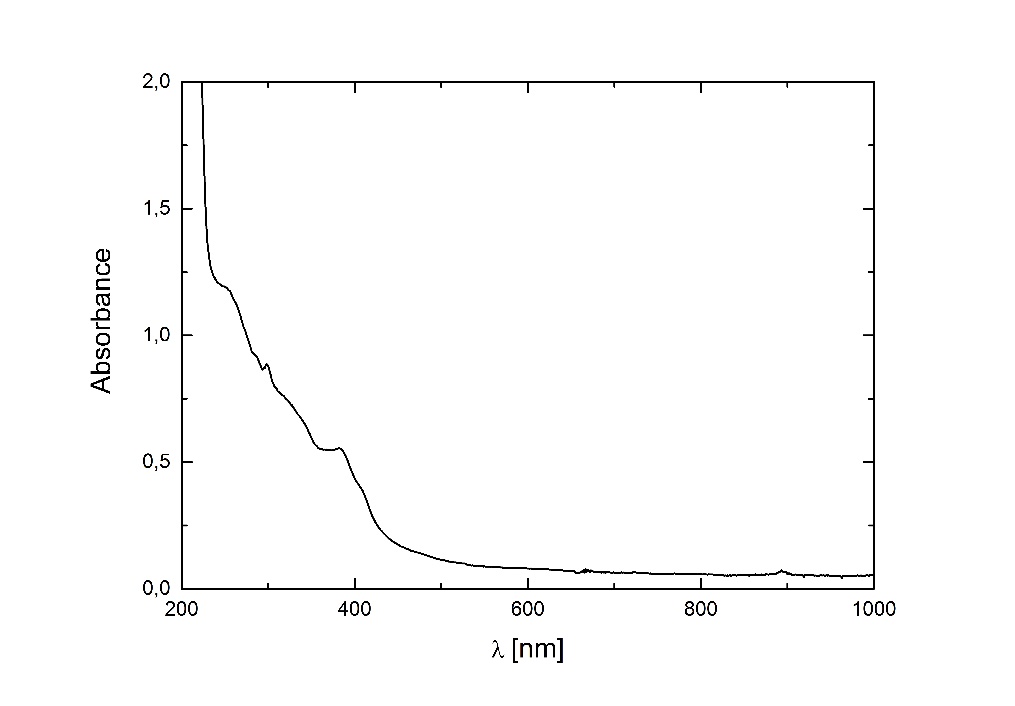


Figure S11. UV-Vis spectrum of **1** in MeCN, d = 1 cm.


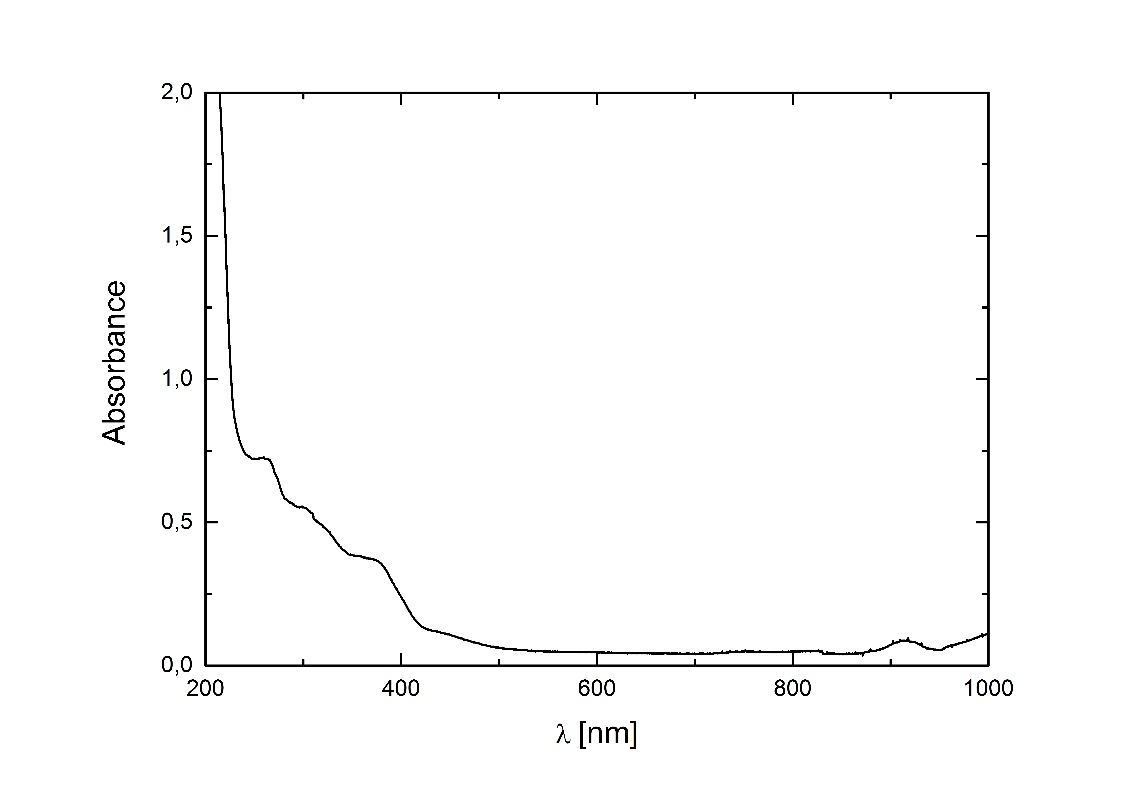


Figure S12. UV-Vis spectrum of **1** in MeOH, d = 1 cm.


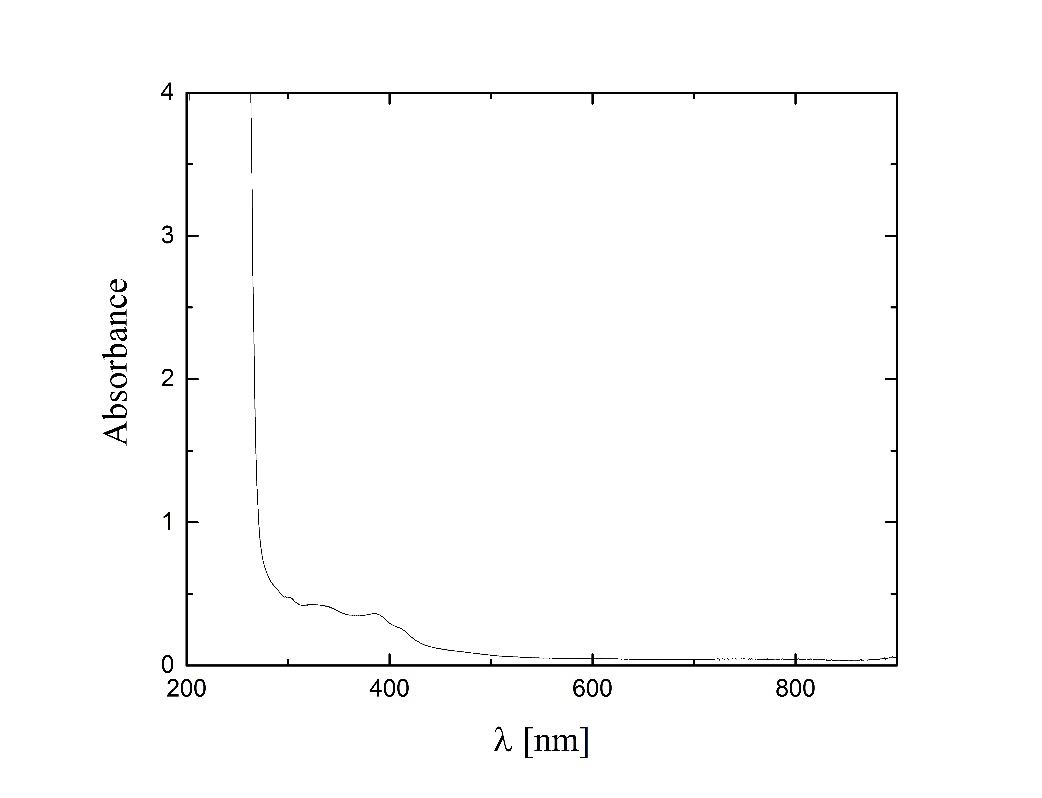


Figure S13. UV-Vis spectrum of **2** in DMF, d = 1 cm.


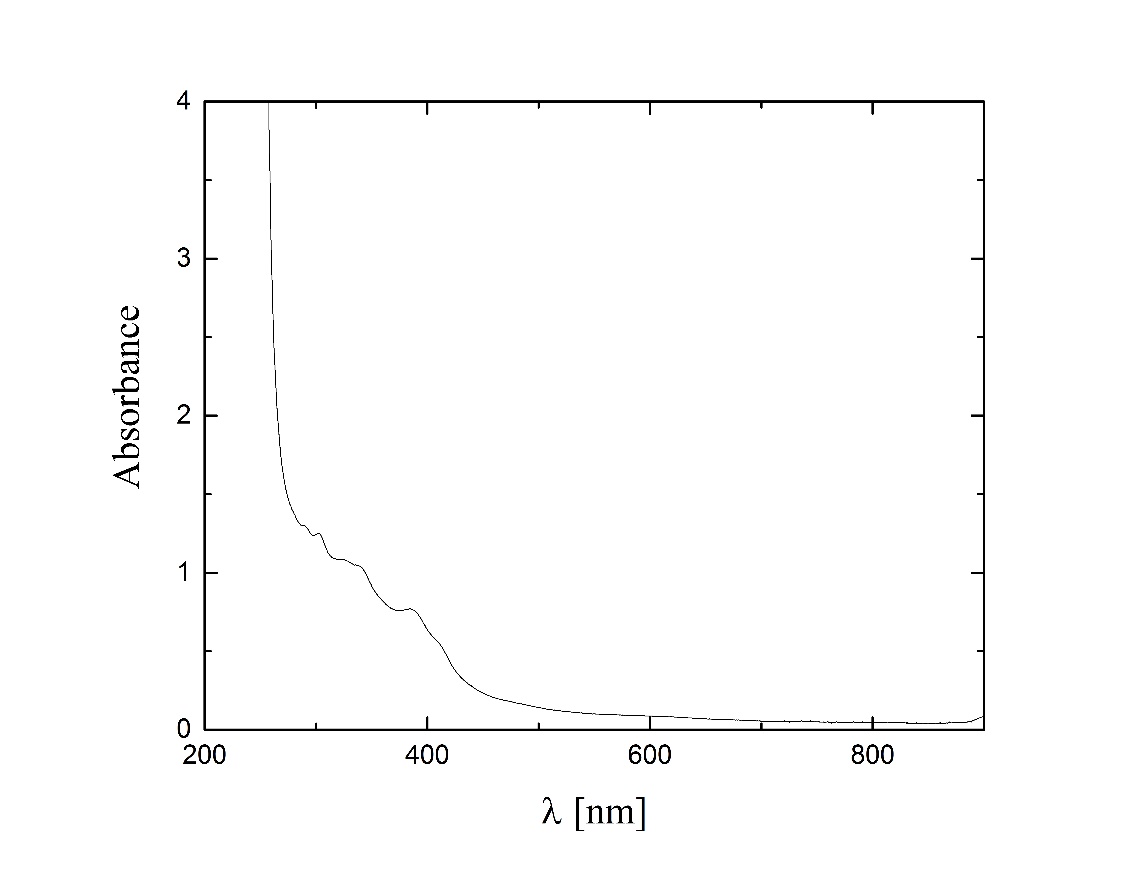


Figure S14. UV-Vis spectrum of **2** in DMSO, d = 1 cm.


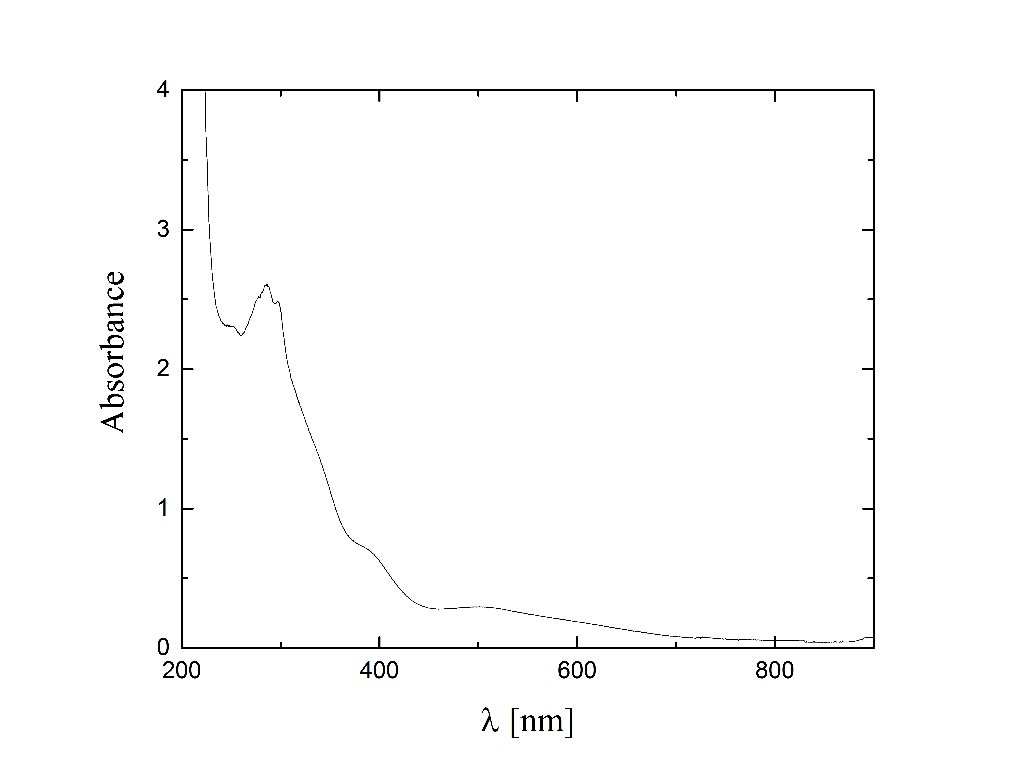


Figure S15. UV-Vis spectrum of **2** in EtCl2, d = 1 cm.


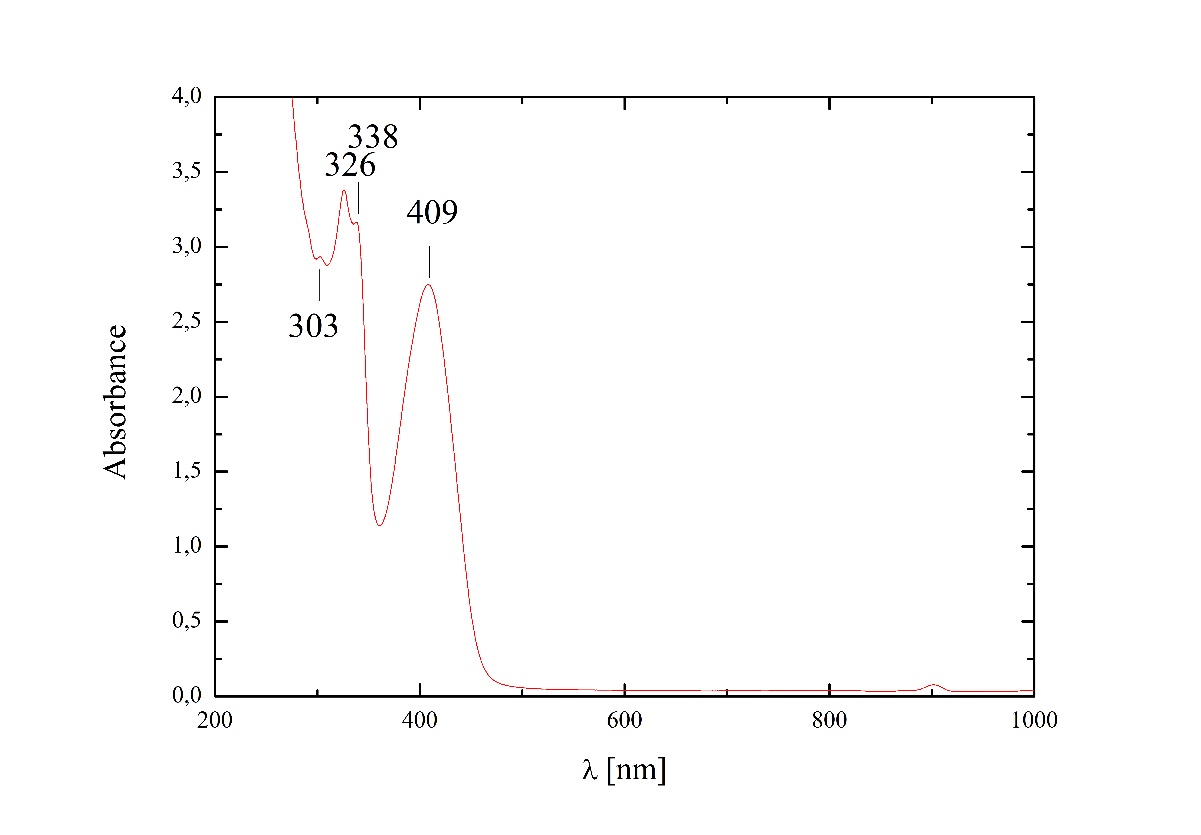


Figure S16. UV-Vis spectrum of **8** in DMSO, d = 1 cm.


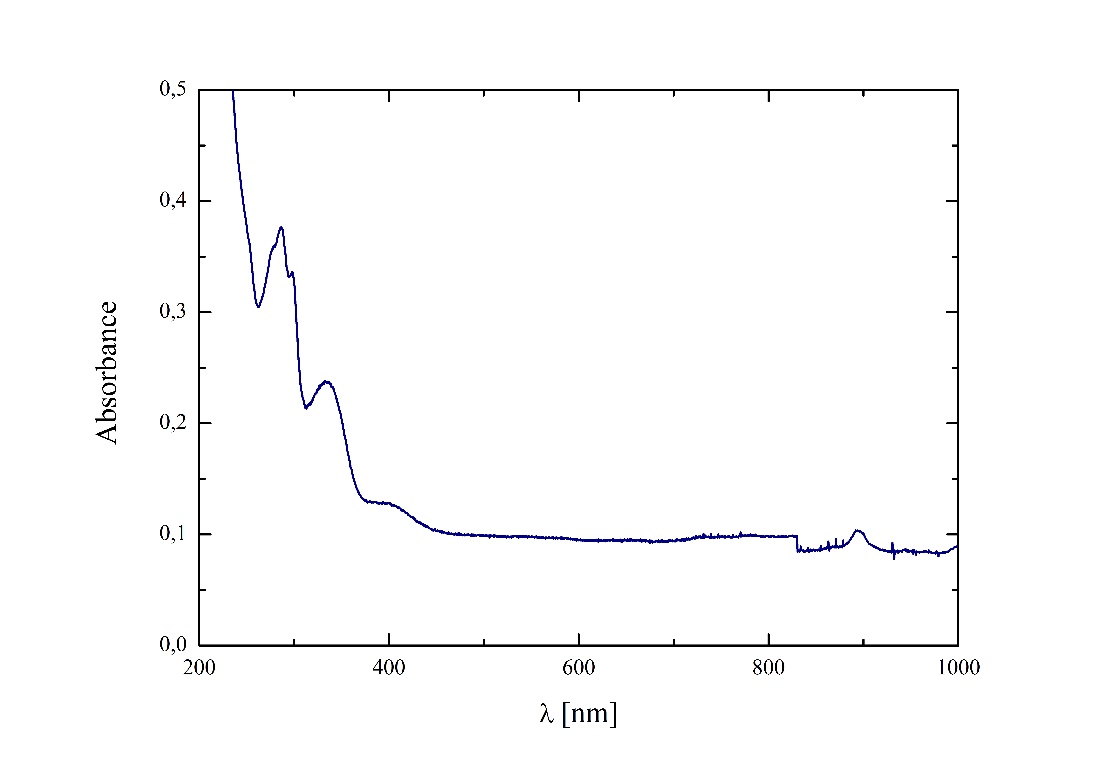


Figure S17. UV-Vis spectrum of **8** in EtCl2, d = 1 cm.


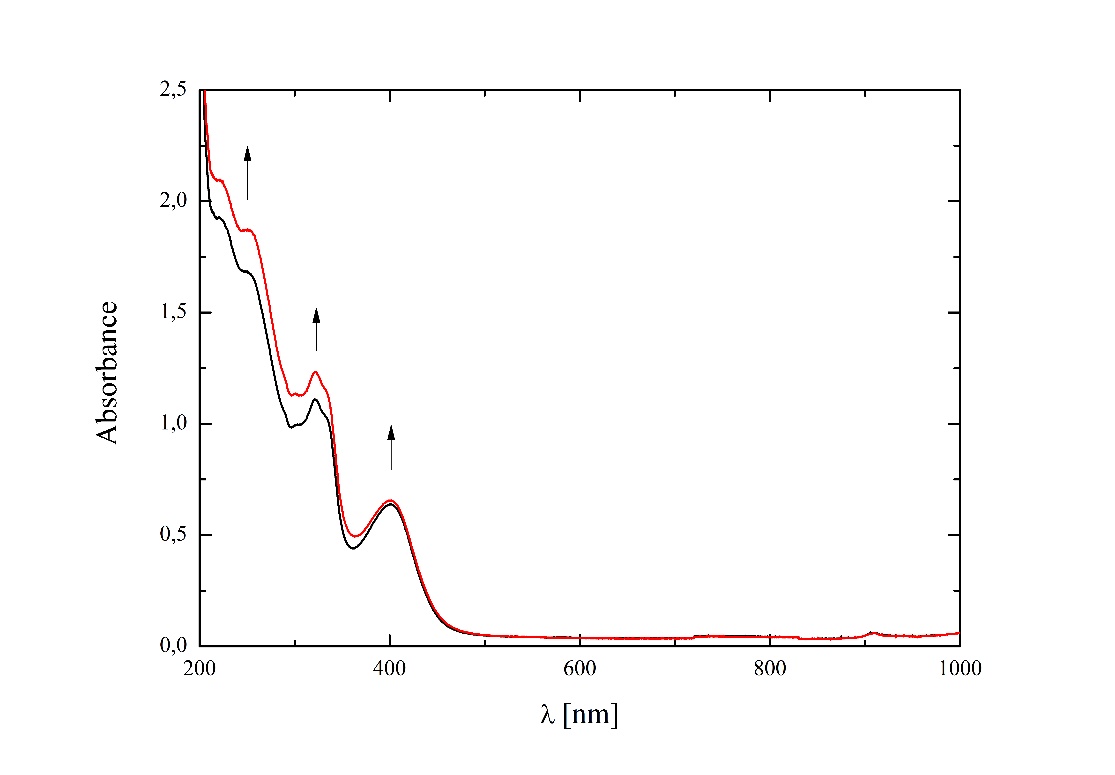


Figure S18. UV-Vis spectrum of **8** in EtOH, d = 1 cm, arrows indicate spectral changes after 20 minutes.


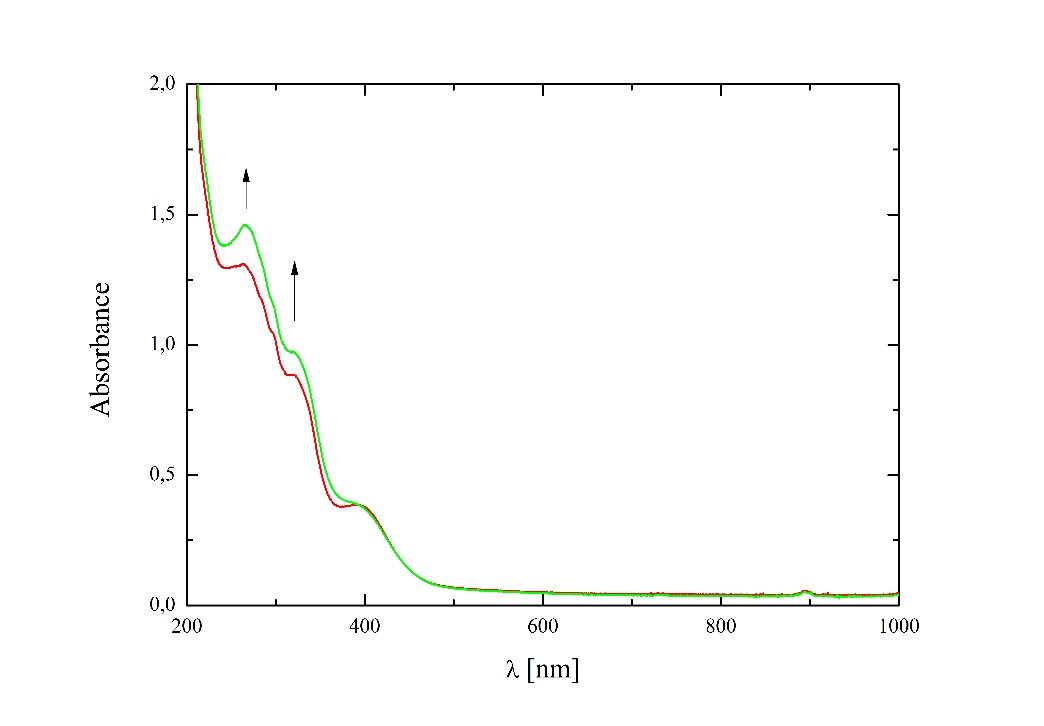


Figure S19. UV-Vis spectrum of **8** in MeCN, d = 1 cm, arrows indicate spectral changes after 20 minutes.


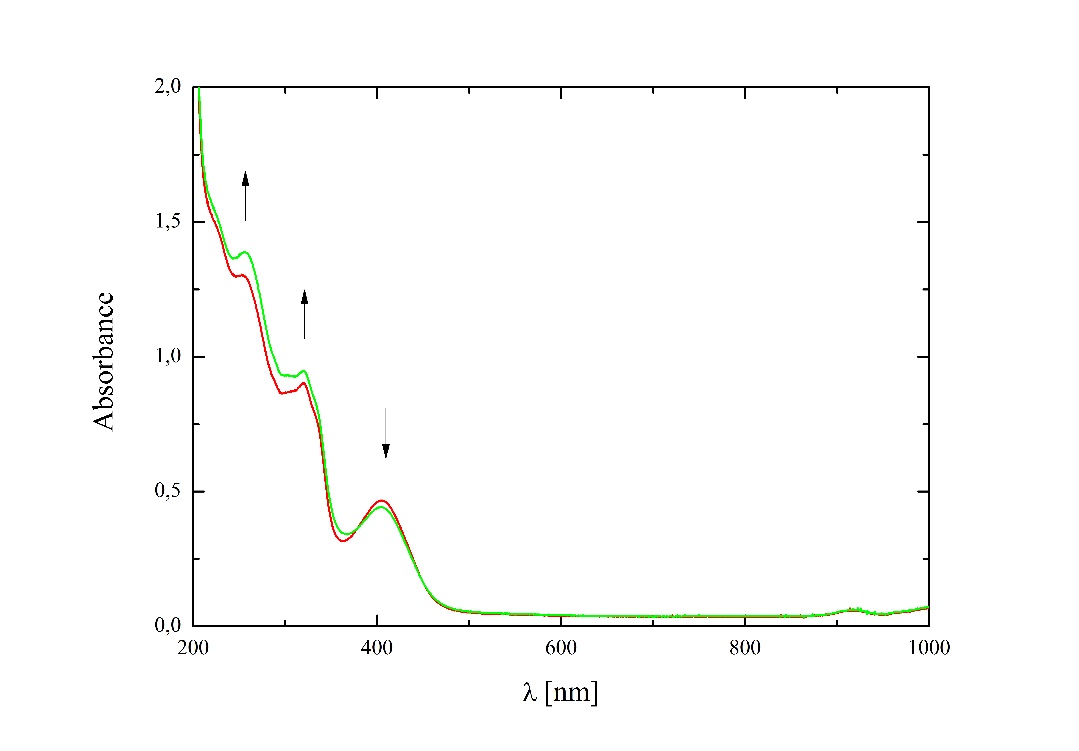


Figure S20. UV-Vis spectrum of **8** in MeOH, d = 1 cm, arrows indicate spectral changes after 20 minutes.


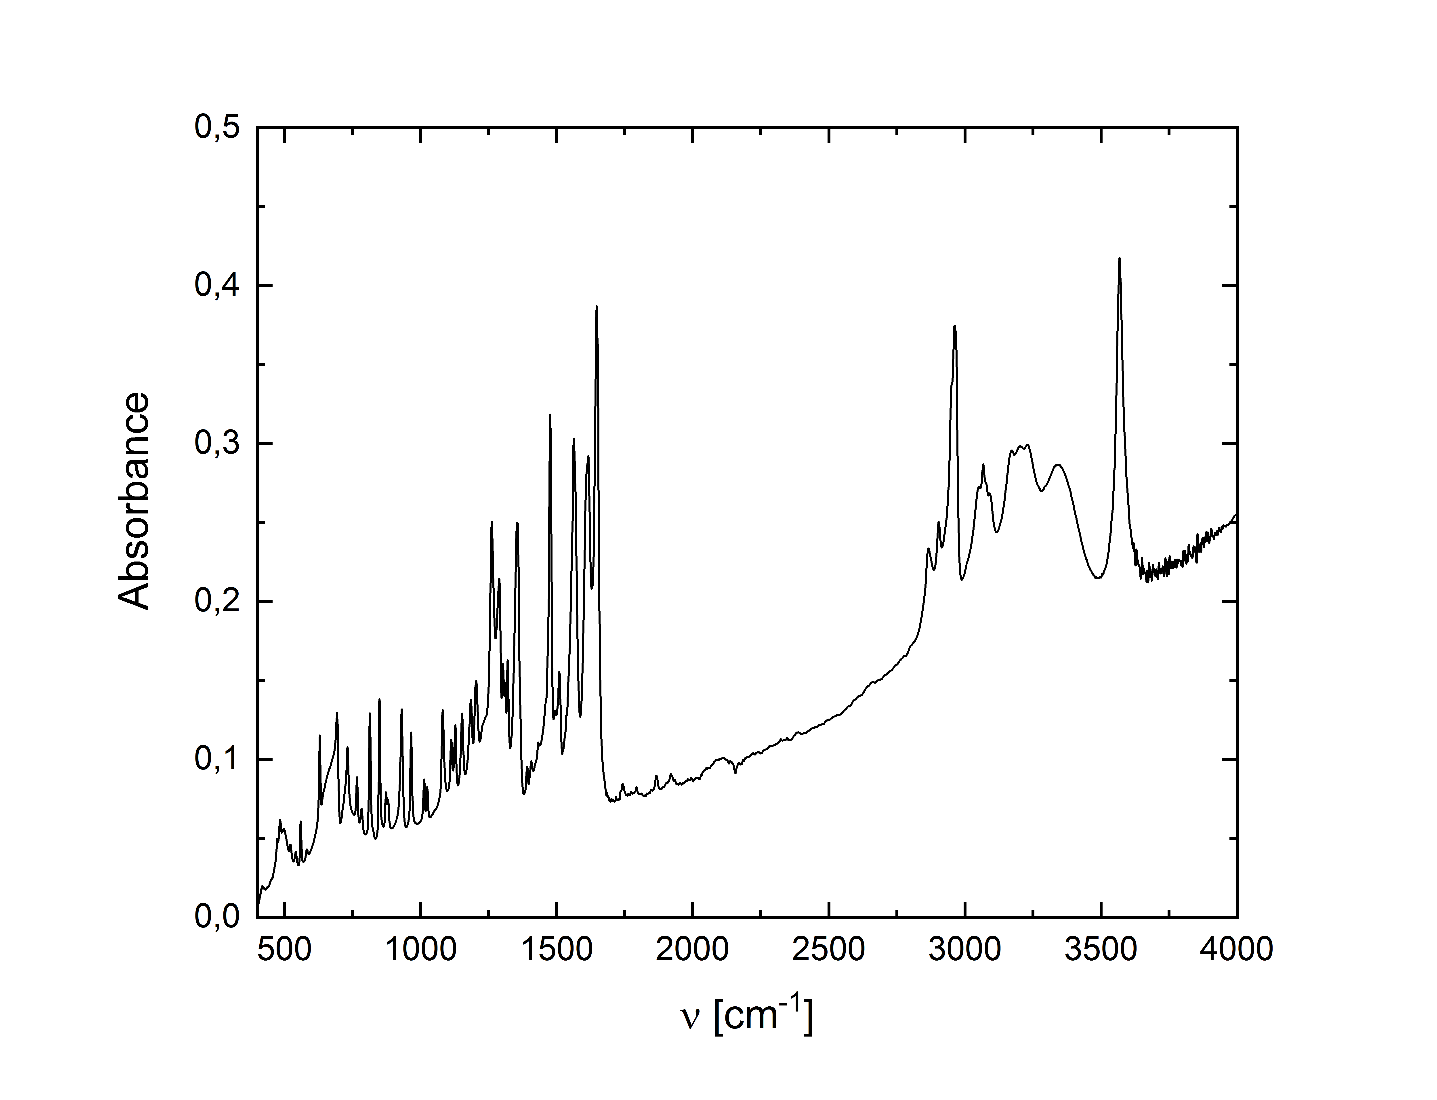


Figure S21. The IR spectrum of ligand L1. ATR spectrum after ATR correction. IR spectrum was recorded on a Nicolet iS5 FT-IR spectrophotometer.


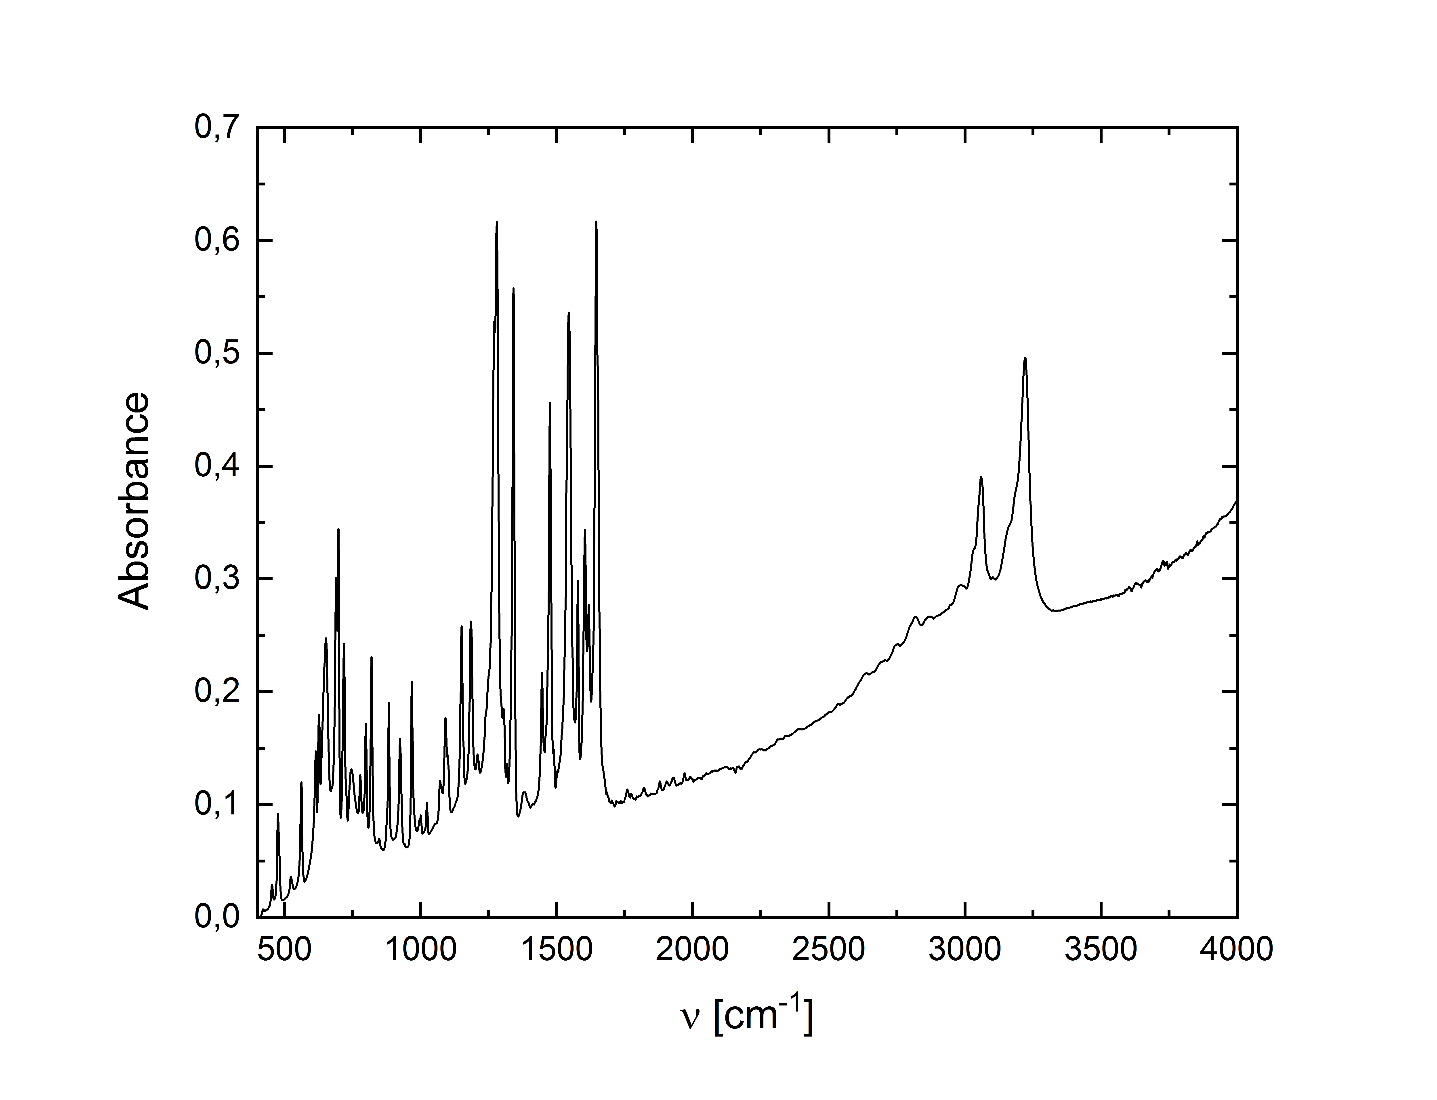


Figure S22. The IR spectrum of ligand L2. ATR spectrum after ATR correction. IR spectrum was recorded on a Nicolet iS5 FT-IR spectrophotometer.
